# Supplementary figures and images for: Genome sequence of the β-rhizobium Cupriavidus taiwanensis and comparative genomics of rhizobia
Source: HighWire-hosted journal article supplement (doi:10.1101/gr.076448.108), 2008-05-19

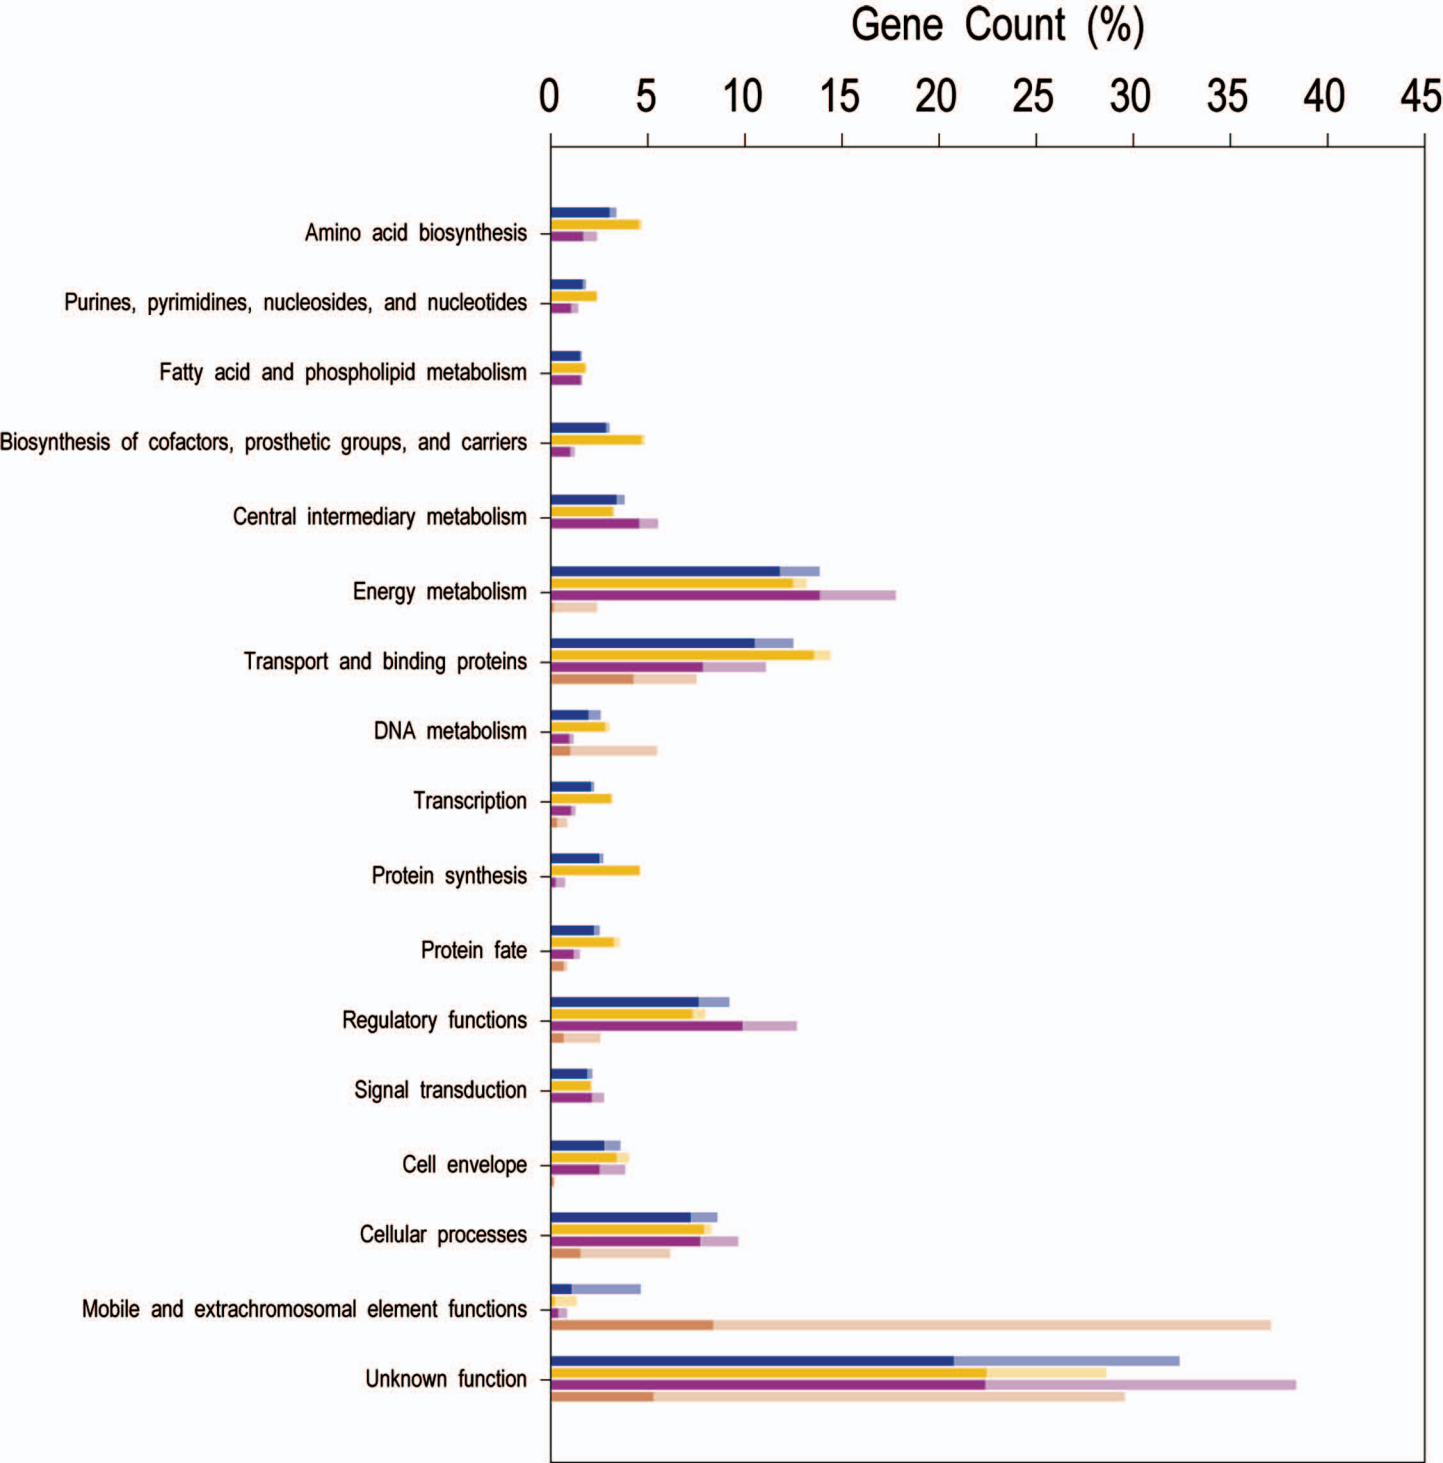

Supplement: figureS3_cmyk_300.pdf [file figureS3_cmyk_300.pdf]
